# Supplementary material for: A single-domain i-body, AD-114, attenuates renal fibrosis through blockade of CXCR4
Source: JCI journal article supplement (doi:10.1172/jci.insight.143018), 2022-01-11
Supplement: sd1 [file 1]

## Supplemental data

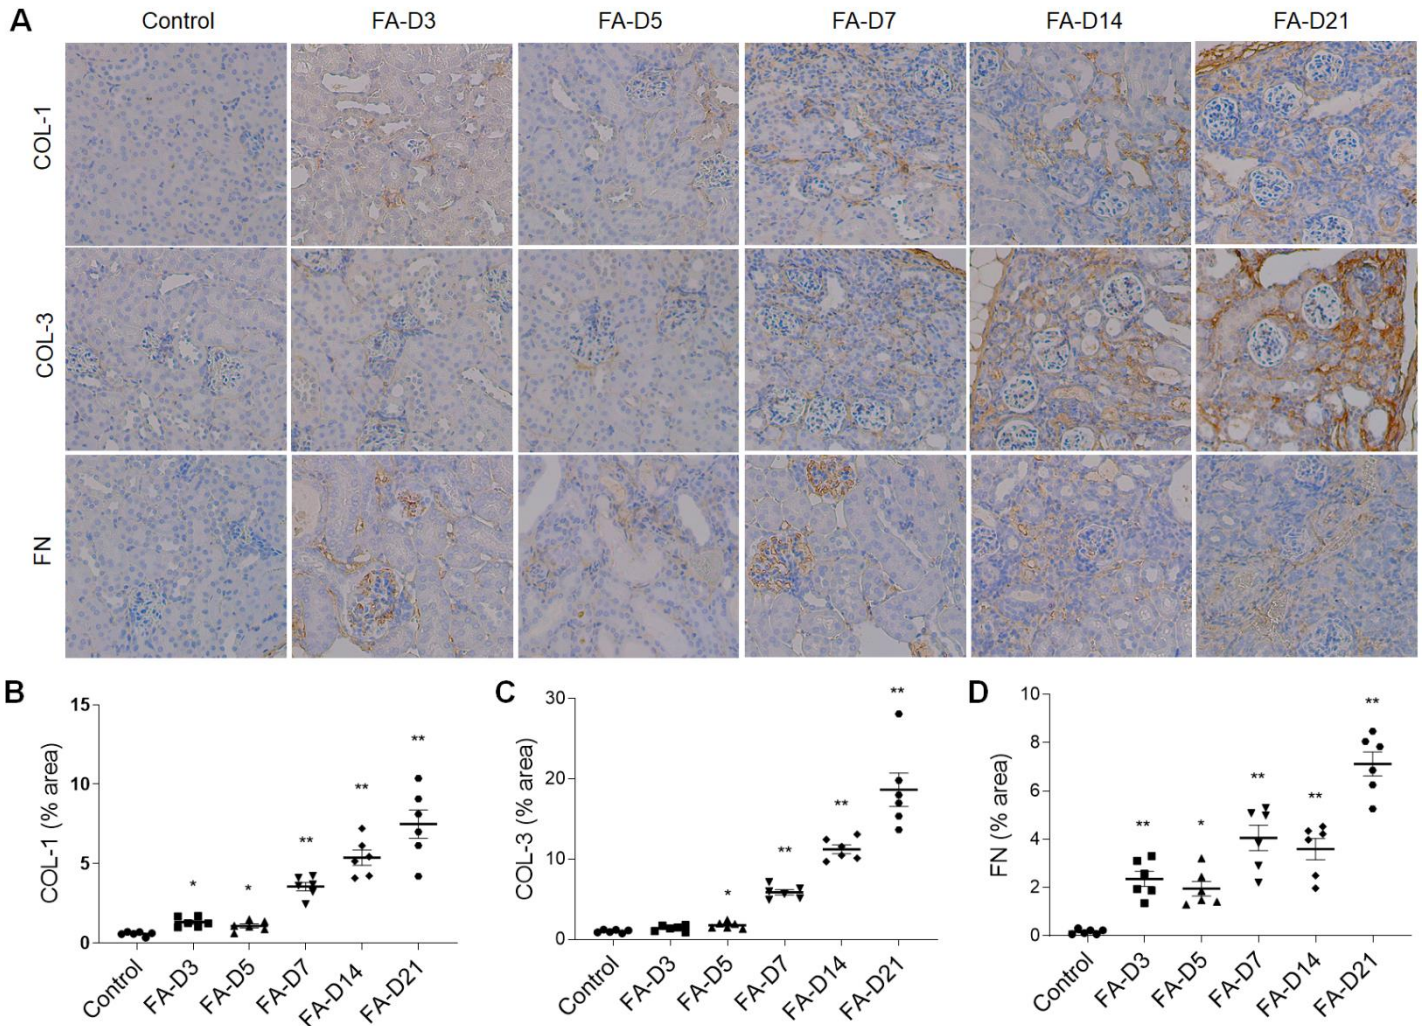

**Supplemental Figure 1. IHC staining and quantitation of fibrotic markers COL-1, COL-3 and FN at different timepoints after FA injection in mice.** Representative images were shown in (A). (B-D) Quantitation of COL-1, COL-3 and FN immunohistochemical staining. Original magnification:  $\times 200$  in all. Statistical analysis was performed using one-way ANOVA followed by Tukey's multiple comparisons test. Results are presented as mean $\pm$ SEM. \* $P < 0.05$ , \*\* $P < 0.01$ .  $n = 6$ .

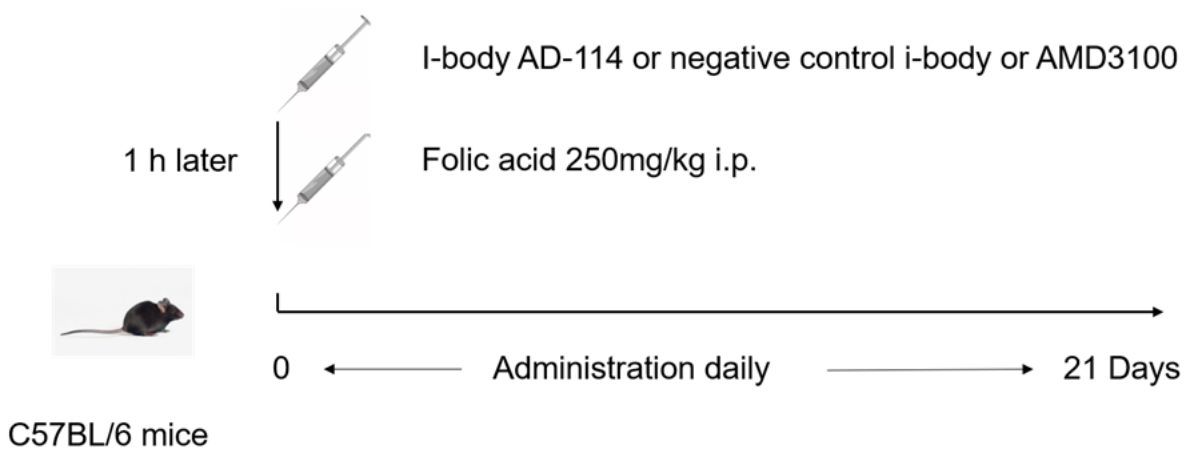

**Supplemental Figure 2.** Schematic representation of the timeline of FA and i-body administration in the preventative study. Male mice at 6-8 weeks of age were injected i.p. with FA to induce fibrosis. Mice were then randomly allocated to receive treatment of AD-114, negative control i-body or AMD3100 i.p. 1h prior to FA injection and then dosed daily until day 21.

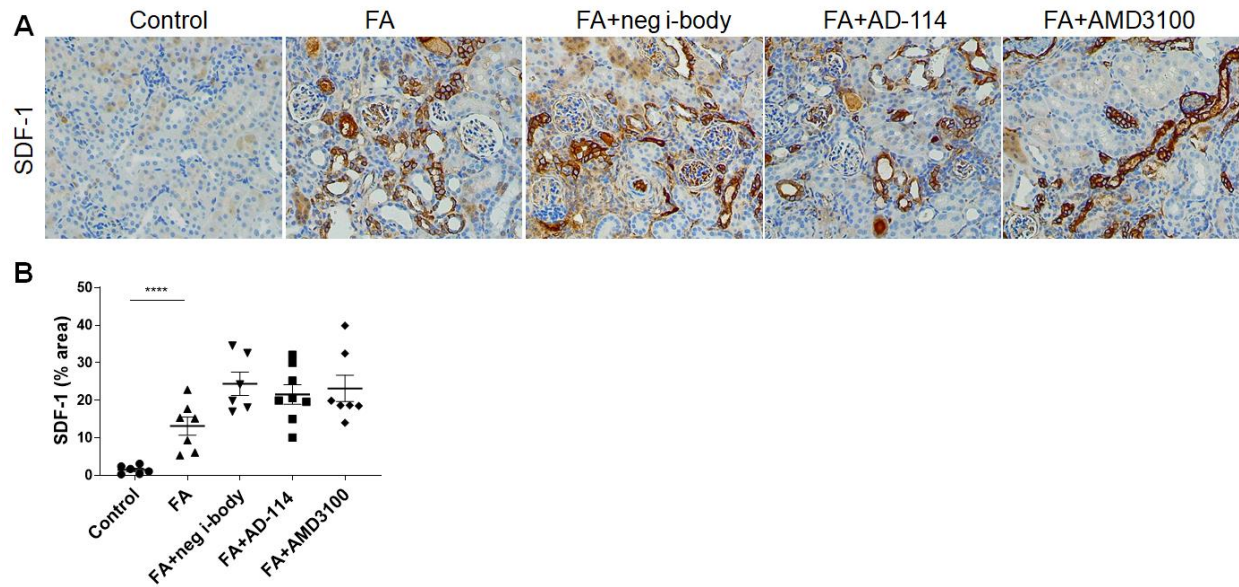

**Supplemental Figure 3. AD-114 did not affect the SDF-1 expression. (A)** Representative images and **(B)** quantitative analysis of SDF-1 immunohistochemical staining in kidneys of mice from Animal study 2 (preventative studies).

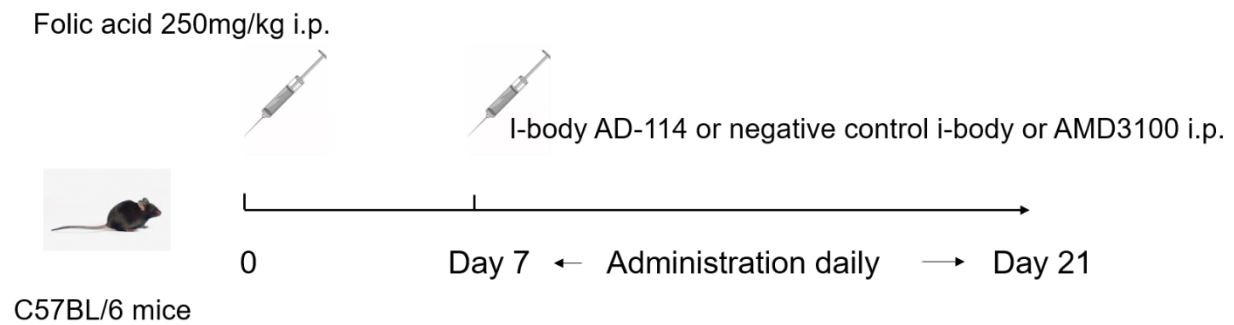

**Supplemental Figure 4.** Schematic representation of the timeline of FA and i-body administration in the therapeutic study. Male mice at 6-8 weeks of age were injected i.p. with FA to induce fibrosis. Mice were then randomly allocated to receive treatment of AD-114, negative control i-body or AMD3100 i.p. from day 7-21.



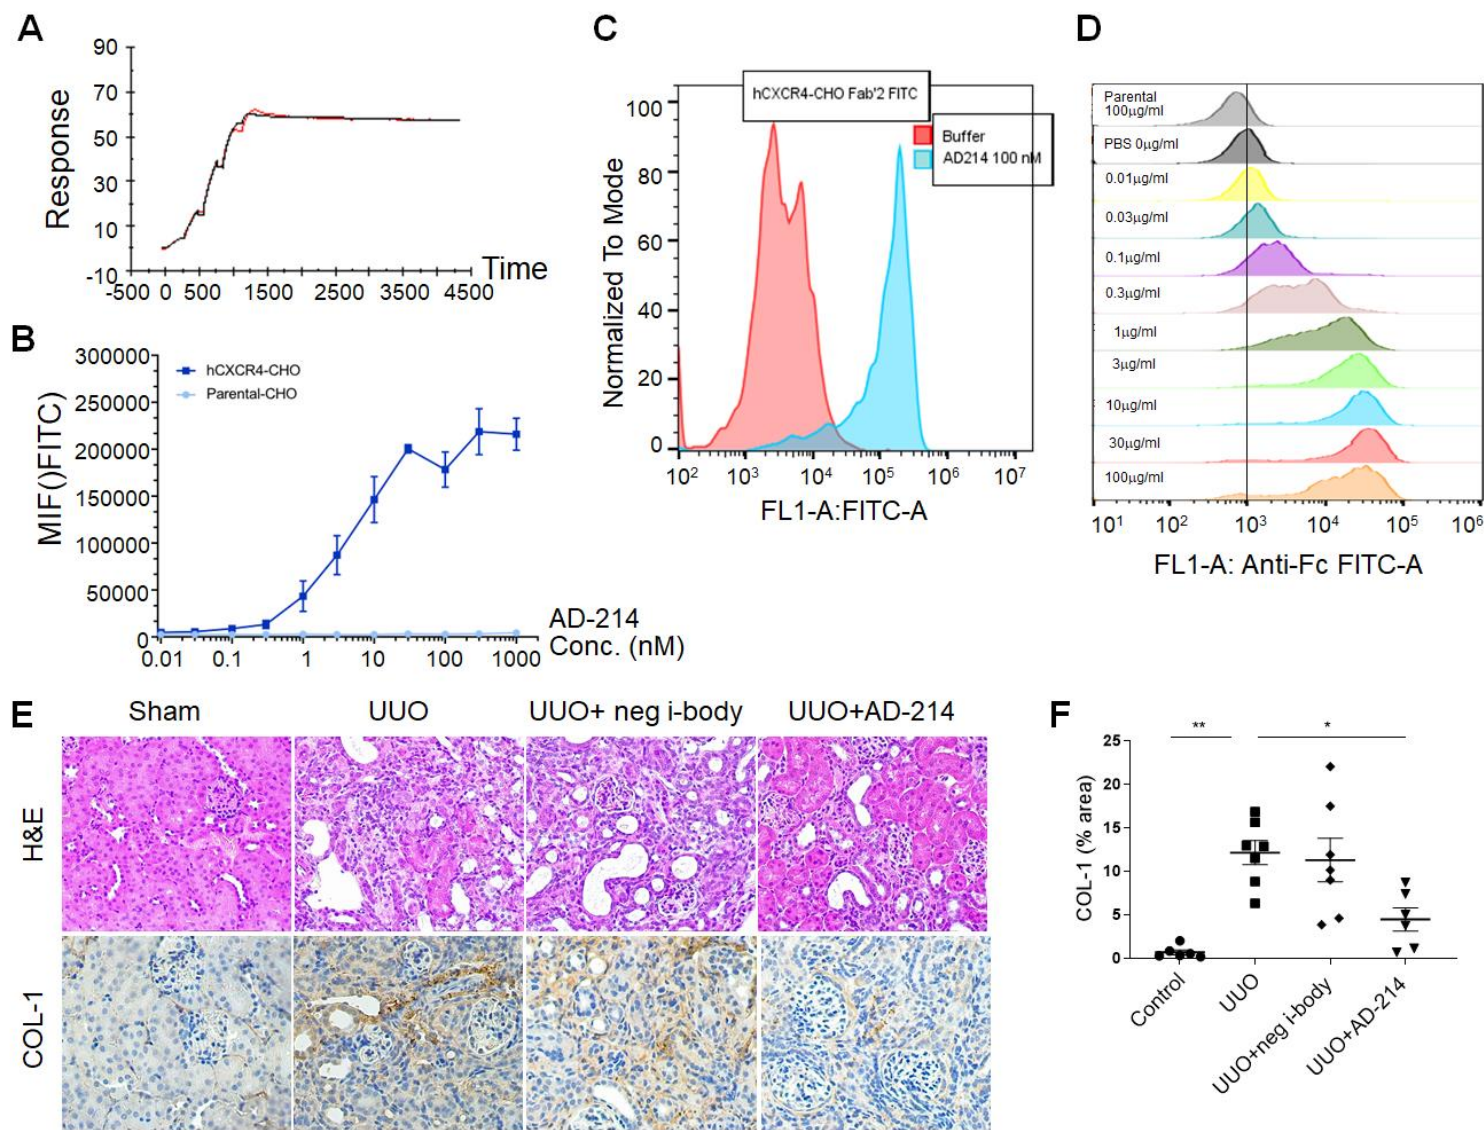

**Supplemental Figure 5. Fc fused I-body AD-114 (AD-214) ameliorated UUO-induced renal fibrotic response.** (A-D) AD-214 bound with high affinity to CXCR4. (A) AD-214 bound to human CXCR4 lipoparticles with affinity of ~4pM. (B) AD-214 binds to CXCR4 expressing CHO cells was detected using a fragment rabbit anti-Human IgG, Fcγ fragment specific F(ab')<sub>2</sub>. Data represents mean ± SEM of 3 replicates. (C) Bound AD-214 (100nM) to hCXCR4 expressed on CHO cells was detected using anti-human-Fc-Fab'2-FITC. (D) AD-214 can bind to CXCR4 expressed on human CD3+ T-cells. AD-214 was directly labelled with Alexa Fluor 647 (AD-214-647) and detected using flow cytometry. (E-F) Mice were dosed with negative i-body or AD-214 i.p. the following day of UUO and were then administrated every second day until day 14. (E) Representative images of H&E staining and IHC staining for COL-1. (F) Quantification of stained area as percentage of total area. Statistical analysis was performed using one-way ANOVA followed by Tukey's multiple comparisons test. Results are presented as mean±SEM. \*P<0.05, \*\*P<0.01. n=6-8. Original magnification: ×200.

**Supplemental Table 1. The sequence of primers used for quantitative RT-PCR.**

| Species | Target                          | Forward (5'-3')         | Reverse (5'-3')         |
|---------|---------------------------------|-------------------------|-------------------------|
| Mouse   | <b><math>\alpha</math>-SMA</b>  | CATCTTTCATTGGGATGGAG    | TTAGCATAGAGATCCTTCCTG   |
|         | <b><math>\beta</math>-Actin</b> | CAGCTGAGAGGGGAAATCGTG   | CGTTGCCAATAGTGATGACC    |
|         | <b>F4/80</b>                    | CCTGGACGAATCCTGTGAAG    | GGTGGGACCACAGAGAGTTG    |
|         | <b>FSP-1</b>                    | GGAGCTGCCTAGCTTCCTG     | TCCTGGAAGTCAACTTCATTGTC |
|         | <b>IL-1<math>\beta</math></b>   | TGTGAAATGCCACCTTTTGA    | TGTCCTCATCCTGGAAGGTC    |
|         | <b>IL-6</b>                     | AAGAAATGATGGATGCTACC    | GAGTTTCTGTATCTCTCTGAAG  |
|         | <b>iNOS</b>                     | GGGTCACAACCTTTACAGGGAGT | CTCTCCACTGCCCCAGTTTT    |
|         | <b>Msr1</b>                     | AAAGGGAGAGAAGGGGAGTG    | GCATGACACAGGAACCAATG    |
|         | <b>Mrc1</b>                     | CAAGGAAGGTTGGCATTGT     | CCTTTCAGTCCTTTGCAAGC    |
|         | <b>TNF-<math>\alpha</math></b>  | CTGTAGCCCACGTCGTAGC     | TTGAGATCCATGCCGTTG      |
|         | <b>Vimentin</b>                 | CCAACCTTTTCTTCCCTGAA    | TGAGTGGGTGTCAACCAGAG    |
| Human   | <b>COL-4A1</b>                  | CGGGTACCCAGGACTCATAG    | GGACCTGCTTCACCCTTTTC    |
|         | <b>FN</b>                       | GCGAGAGTGCCCCTACTACA    | GTTGGTGAATCGCAGGTCA     |
|         | <b>GAPDH</b>                    | AGCCACATCGCTCAGACAC     | GCCCAATACGACCAAATCC     |
|         | <b>MMP-2</b>                    | ATAACCTGGATGCCGTCGT     | AGGCACCCTTGAAGAAGTAGC   |
